# Supplementary material for: Annona cherimola Seed Extract Activates Extrinsic and Intrinsic Apoptotic Pathways in Leukemic Cells
Source: Toxins (Basel). 2019 Aug 30;11(9):506. doi: 10.3390/toxins11090506 (PMC6784061; doi:10.3390/toxins11090506)
Supplement: Supplementary file 1 [file toxins-11-00506-s001.pdf]

# Supplementary Materials: *Annona cherimola* Seed Extract Activates Extrinsic and Intrinsic Apoptotic Pathways in Leukemic Cells

Tony Haykal, Peter Nasr, Mohammad H. Hodroj, Robin I. Taleb, Rita Sarkis, Marvy Nadine El. Moujabber and Sandra Rizk

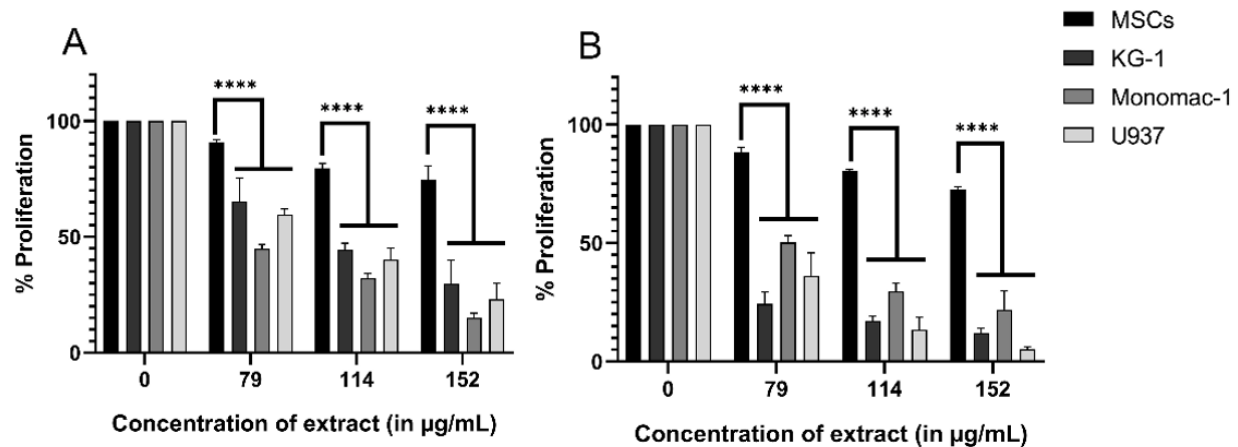

**Figure S1.** Comparison of the proliferation reduction induced by various concentrations of *Annona cherimola* seed ethanolic extract (ASEE) in normal mesenchymal cells (MSCs) versus acute myeloid leukemia (AML) cell lines (KG-1, Monomac-1, and U937) at 24 h (a) and 48 h (b). \*\*\*\* indicates a  $p$ -value < 0.001.
